# Supplementary material
Source: HighWire-hosted journal article supplement (https://www.cfp.ca/highwire/filestream/30424/field_highwire_adjunct_files/0/Infant_stool_colour_card.pdf)

## BC INFANT STOOL COLOUR CARD® SCREENING PROGRAM FOR BILIARY ATRESIA

### Abnormal Stool Colours

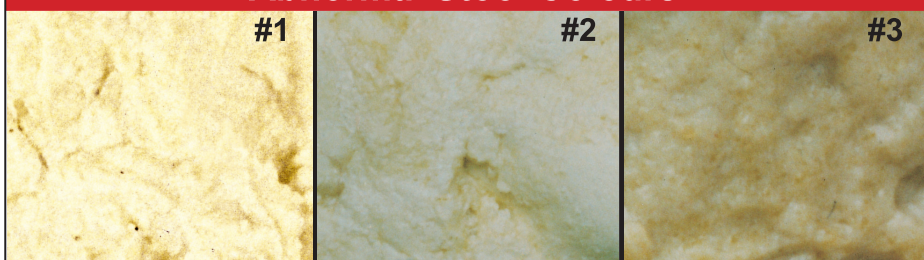

### Normal Stool Colours

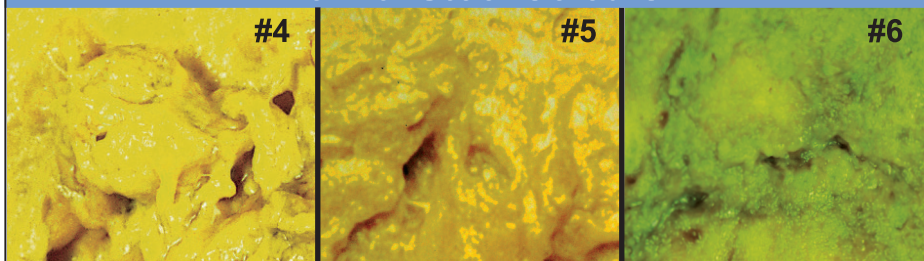

**CHECK YOUR BABY'S STOOL COLOUR EVERY DAY  
FOR THE FIRST MONTH AFTER BIRTH TO SCREEN  
FOR BILIARY ATRESIA**

**What is Biliary Atresia?** Biliary Atresia is a rare but serious liver disease that begins to affect newborns in the first month of life. It is the most common reason why children need a liver transplant and it is life-threatening if it is not treated.

**What are the warning signs of Biliary Atresia?** It is very normal to see yellow colour of your baby's skin or eyes (a condition known as jaundice) in the first few days after birth. However, some babies may have jaundice that lasts longer than two weeks. If your baby has jaundice for longer than two weeks and also has pale yellow, chalk white or clay coloured stools, these are warning signs that your baby could have Biliary Atresia.

**How can you help screen for Biliary Atresia?** Check your baby's stool colour **EVERY DAY** for the first month after birth. **If at any time you notice that your baby has an abnormal stool colour (Abnormal Stool Colours - number 1, 2, or 3 pictured above), please promptly contact the BC Infant Stool Colour Card® Screening Program at:**

Phone Toll Free Number: 1-877-583-7842 (1-877-5-TEST-4-BA)

Email: [psbc@phsa.ca](mailto:psbc@phsa.ca)

Fax: 604-875-3244

Please make sure that the following information is included in your phone message, email or fax:

- Date of your baby's birth.
- Name of the hospital where your baby was born.
- Mother's first name, last name and maiden name.
- Your home phone number and cell number.

**If you need more information, please visit our website:**

[www.perinatalservicesbc.ca](http://www.perinatalservicesbc.ca)

Acknowledgement to the Bureau of Health Promotion, Department of Health, Taiwan, and Professor Mei-Hwei Chang, College of Medicine, National Taiwan University for permission to use the infant stool colour card.  
©2008 Bureau of Health Promotion, Department of Health, Taiwan

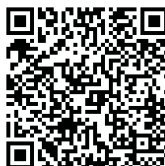

Supplement: Infant_stool_colour_card.pdf [file Infant_stool_colour_card.pdf]
